# Supplementary material
Source: publisher figshare collection journal article supplement (https://gsapubs.figshare.com/ndownloader/files/32390177)
Supplement: Supplementary file 1 [file 32390177]

## Sheet: DIP-11. Slide 2, FIA-1
Supplemental File S5
DIP-11. Slide 2, FIA-1 (Primary FIA in late calcite)
Observations for a primary FIA in a
3-D array of large fluid inclusions near the core of the crystal.
Out of at least 20 inclusions, only one was observed with a vapor bubble. The rest
were all-liquid (one phase) aqueous fluid inclusions. The. Th was not measured.
*The vast majority of all-liquid primary fluid inclusions in this FIA is strong evidence
of entrapment below about 50°C (Goldstein & Reynolds, 1994).

## Sheet: Info
Supplemental Material for Malone, D., Craddock, J., Wallenberg, A., Gaschot, B., and Luczaj, J.A., 2022, Geology of Chief Joseph Pass,
Wyoming: Crest of Rattlesnake Mountain anticline and escape path of the Eocene Heart Mountain slide, in Craddock, J.P., Malone,
D.H., Foreman, B.Z., and Konstantinou, A., eds., Tectonic Evolution of the Sevier-Laramide Hinterland, Thrust Belt, and Foreland, and
Postorogenic Slab Rollback (180–20 Ma): Geological Society of America Special Paper 555, https://doi.org/10.1130/2022.2555(12).

## Sheet: DIP-11. Slide 4, FIA-2
DIP-11. Slide 4, FIA-2 (Primary FIA in late calcite)
Homogenization temperatures (Th) for a primary FIA in a
3-D array of large fluid inclusions near the core of the crystal.
Inclusion	Size (µm)	Shape	Th (°C)	Uncertainty (°C)
1	30	rhomb	unmeasurable	leaked
2	12	irregular	70	0.7
3	44	irreg. elongated	≤ 50	estimated*
4	116	irregular	≤ 50	estimated*
5	140	irregular	≤ 50	estimated*
6	16	irregular	≤ 50	estimated*
7	10	irregular	≤ 50	estimated*
8	5	irreg.rhomb	≤ 50	estimated*
*The vast majority of all-liquid primary fluid inclusions in this FIA is strong evidence
of entrapment below about 50°C (Goldstein & Reynolds, 1994).

## Sheet: DIP-11. Slide 3, FIA-3
DIP-11. Slide 3, FIA-3 (Secondary FIA in late calcite)
Homogenization temperatures (Th) for a secondary FIA in a
planar array inside a late, large euhedral calcite crystal.
Inclusion	Size (µm)	Shape	Th (°C)	Uncertainty (°C)
1	4 x 1	elongated	58.3	0.5
2	8	irreg. rectangle	53.5	0.5
3	4	irreg. oval	59.8	0.5
4	2.5	irreg. oval	59.8	0.5
5	7	irreg. oval	54.5	0.5
6	6	oval	59.8	0.5
7	18	irreg. oval	59.8	0.1
8	3.5	irreg. oval	56.3	1.3
9	6	elong. oval	56.8	0.5
10	5	oval	57.3	0.5
		Average Th:	57.59	°C
No relationship is observed between Th and inclusion size.
The Th range is only 6.3°C, suggesting that this is a consistent assemblage per
the criteria of Goldstein and Reynolds (1994). Therefore, the Th of 57.6°C
is a reliable estimate for the temperature of entrapment for this secondary FIA.
Statement about other Secondary FIAs:
All other secondary FIAs observed in this and other thin sections (at least 4-5 other FIAs)
appeared to have only all-liquid aqueous inclusions, suggesting entrapment for
the others at temperatures ≤ 50°C.
